# Supplementary material for: Solution-processed amorphous zinc indium tin oxide thin-film transistors with high stability under AC stress
Source: Royal Society of Chemistry journal article supplement (doi:10.1039/d3tc02439c), 2023-01-01
Supplement: d3tc02439c1.pdf [file d3tc02439c1.pdf]

## Supporting Information

### **Solution-Processed Amorphous Zinc Indium Tin Oxide Thin-Film Transistors with High Stability under AC Stress**

Dongil Ho,<sup>1,+</sup> Hyewon Jeong,<sup>1,+</sup> Hun Bum Park,<sup>2</sup> Sung Kyu Park,<sup>2</sup> Myung-Gil Kim,<sup>3</sup> Choongik Kim<sup>1,\*</sup>

<sup>1</sup> Department of Chemical and Biomolecular Engineering, Sogang University, 1 Shinsoo-dong, Mapo-gu, Seoul 04107, Republic of Korea

E-mail: choongik@sogang.ac.kr

<sup>2</sup> School of Electrical and Electronics Engineering, Chung-Ang University, 84 Heukseok-ro, Dongjak-gu, Seoul 06974, Republic of Korea

<sup>3</sup> School of Advanced Materials Science and Engineering, Sungkyunkwan University, Suwon 16419, Republic of Korea

+ These authors contributed equally to this work.

Keywords: thin film transistors; metal oxide; AC stress; semiconductor; hot carrier

**Table S1.** Representative electrical performance with deviations of *a*-IGZO TFTs under DC drain stress.

| DC stress time (sec) | Mobility (cm <sup>2</sup> V <sup>-1</sup> s <sup>-1</sup> ) | V <sub>th</sub> (V) | V <sub>on</sub> (V) | I <sub>on</sub> /I <sub>off</sub> |
|----------------------|-------------------------------------------------------------|---------------------|---------------------|-----------------------------------|
| 0                    | 1.4 ± 0.2                                                   | 0.14 ± 0.3          | -3.0 ± 1.4          | (1.9 ± 0.4) × 10 <sup>9</sup>     |
| 10                   | 1.4 ± 0.3                                                   | 0.34 ± 0.2          | -3.0 ± 1.4          | (4.5 ± 0.9) × 10 <sup>9</sup>     |
| 60                   | 1.5 ± 0.3                                                   | 0.010 ± 0.4         | -3.0 ± 1.4          | (3.8 ± 3.7) × 10 <sup>12</sup>    |
| 100                  | 1.4 ± 0.2                                                   | 0.32 ± 0.2          | -3.0 ± 1.5          | (1.3 ± 1.2) × 10 <sup>11</sup>    |
| 1000                 | 1.5 ± 0.2                                                   | 0.030 ± 0.4         | -2.5 ± 1.0          | (1.1 ± 1.0) × 10 <sup>10</sup>    |
| 3600                 | 1.6 ± 0.3                                                   | 0.17 ± 0.3          | -2.0 ± 1.2          | (5.9 ± 2.7) × 10 <sup>9</sup>     |
| Δ                    | 0.2                                                         | 0.03                | 1.0                 | 4.0 × 10 <sup>9</sup>             |

Δ: Difference in electrical performance between stress time of 0 and 3600 s.

**Table S2.** Representative electrical performance with deviations of *a*-IGZO TFTs under AC drain stress.

| AC stress time (sec) | Mobility (cm <sup>2</sup> V <sup>-1</sup> s <sup>-1</sup> ) | V <sub>th</sub> (V) | V <sub>on</sub> (V) | I <sub>on</sub> /I <sub>off</sub> |
|----------------------|-------------------------------------------------------------|---------------------|---------------------|-----------------------------------|
| 0                    | 1.6 ± 0.2                                                   | 1.1 ± 0.3           | -3.5 ± 0.8          | (3.5 ± 0.5) × 10 <sup>6</sup>     |
| 10                   | 1.6 ± 0.3                                                   | 1.3 ± 0.2           | -2.0 ± 0.5          | (3.4 ± 0.3) × 10 <sup>6</sup>     |
| 60                   | 1.7 ± 0.2                                                   | 1.5 ± 0.3           | -2.5 ± 0.2          | (3.3 ± 1.2) × 10 <sup>6</sup>     |
| 100                  | 1.7 ± 0.2                                                   | 1.5 ± 0.2           | -2.0 ± 0.4          | (3.8 ± 0.3) × 10 <sup>6</sup>     |
| 1000                 | 1.5 ± 0.4                                                   | 2.6 ± 0.4           | -2.0 ± 0.5          | (2.5 ± 0.3) × 10 <sup>6</sup>     |
| 3600                 | 1.4 ± 0.3                                                   | 2.7 ± 0.4           | -2.5 ± 0.1          | (1.2 ± 0.6) × 10 <sup>6</sup>     |
| Δ                    | -0.2                                                        | 1.6                 | 1.0                 | -2.3 × 10 <sup>6</sup>            |

Δ: Difference in electrical performance between stress time of 0 and 3600 s.

**Table S3.** Representative electrical performance with deviations of *a*-ZITO (2:1:1) TFTs under AC drain stress.

| AC stress time (sec) | Mobility (cm <sup>2</sup> V <sup>-1</sup> s <sup>-1</sup> ) | V <sub>th</sub> (V) | V <sub>on</sub> (V) | I <sub>on</sub> /I <sub>off</sub> |
|----------------------|-------------------------------------------------------------|---------------------|---------------------|-----------------------------------|
| 0                    | 6.8 ± 0.2                                                   | 0.93 ± 0.2          | -2.0 ± 0.5          | (1.1 ± 1.0) × 10 <sup>10</sup>    |
| 10                   | 7.0 ± 0.3                                                   | 1.4 ± 0.1           | -1.5 ± 0.2          | (3.5 ± 2.4) × 10 <sup>10</sup>    |
| 60                   | 7.1 ± 0.2                                                   | 1.5 ± 0.2           | -1.5 ± 0.2          | (5.6 ± 5.3) × 10 <sup>10</sup>    |
| 100                  | 7.1 ± 0.3                                                   | 1.6 ± 0.2           | -1.5 ± 0.5          | (1.1 ± 1.0) × 10 <sup>11</sup>    |
| 1000                 | 7.0 ± 0.7                                                   | 1.5 ± 0.3           | -1.0 ± 0.3          | (2.8 ± 1.7) × 10 <sup>10</sup>    |
| 3600                 | 7.2 ± 0.6                                                   | 1.6 ± 0.2           | -1.0 ± 0.2          | (3.0 ± 2.5) × 10 <sup>10</sup>    |
| Δ                    | 0.4                                                         | 0.67                | 1.0                 | 1.9 × 10 <sup>10</sup>            |

Δ: Difference in electrical performance between stress time of 0 and 3600 s.

**Table S4.** Representative electrical performance with deviations of *a*-ZITO (4:1:1) TFTs under AC drain stress.

| AC stress time (sec) | Mobility (cm <sup>2</sup> V <sup>-1</sup> s <sup>-1</sup> ) | V <sub>th</sub> (V) | V <sub>on</sub> (V) | I <sub>on</sub> /I <sub>off</sub> |
|----------------------|-------------------------------------------------------------|---------------------|---------------------|-----------------------------------|
| 0                    | 7.4 ± 0.2                                                   | 1.3 ± 0.2           | -1.0 ± 0.2          | (4.2 ± 2.2) × 10 <sup>10</sup>    |
| 10                   | 7.6 ± 0.2                                                   | 1.5 ± 0.3           | -0.5 ± 0.2          | (2.5 ± 2.4) × 10 <sup>12</sup>    |
| 60                   | 7.6 ± 0.2                                                   | 1.5 ± 0.4           | -1.0 ± 0.5          | (4.1 ± 4.0) × 10 <sup>11</sup>    |
| 100                  | 7.6 ± 0.2                                                   | 1.6 ± 0.3           | -2.0 ± 1.5          | (4.9 ± 3.5) × 10 <sup>10</sup>    |
| 1000                 | 7.6 ± 0.2                                                   | 1.6 ± 0.2           | -0.5 ± 0.5          | (2.5 ± 1.0) × 10 <sup>11</sup>    |
| 3600                 | 7.7 ± 0.4                                                   | 1.7 ± 0.2           | -0.5 ± 0.5          | (1.5 ± 1.1) × 10 <sup>11</sup>    |
| Δ                    | 0.3                                                         | 0.4                 | 0.5                 | 1.1 × 10 <sup>11</sup>            |

Δ: Difference in electrical performance between stress time of 0 and 3600 s.

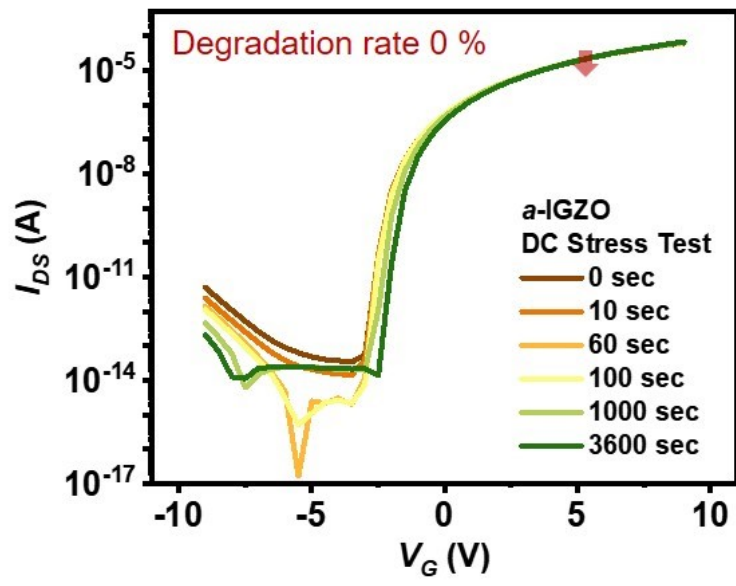

Figure S1. DC stress test results of *a*-IGZO TFTs

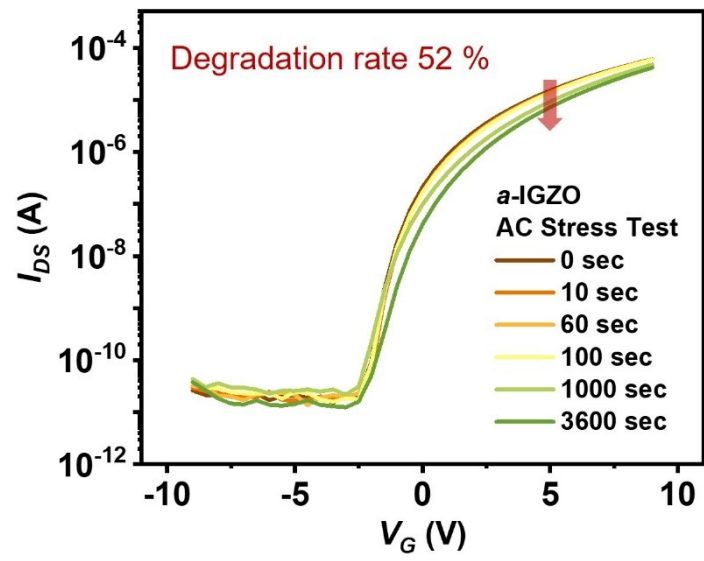

**Figure S2.** AC stress test result of *a*-IGZO TFT by sweeping the  $I_{DS}$ - $V_G$  graph with a reversed direction of drain-source voltage bias.

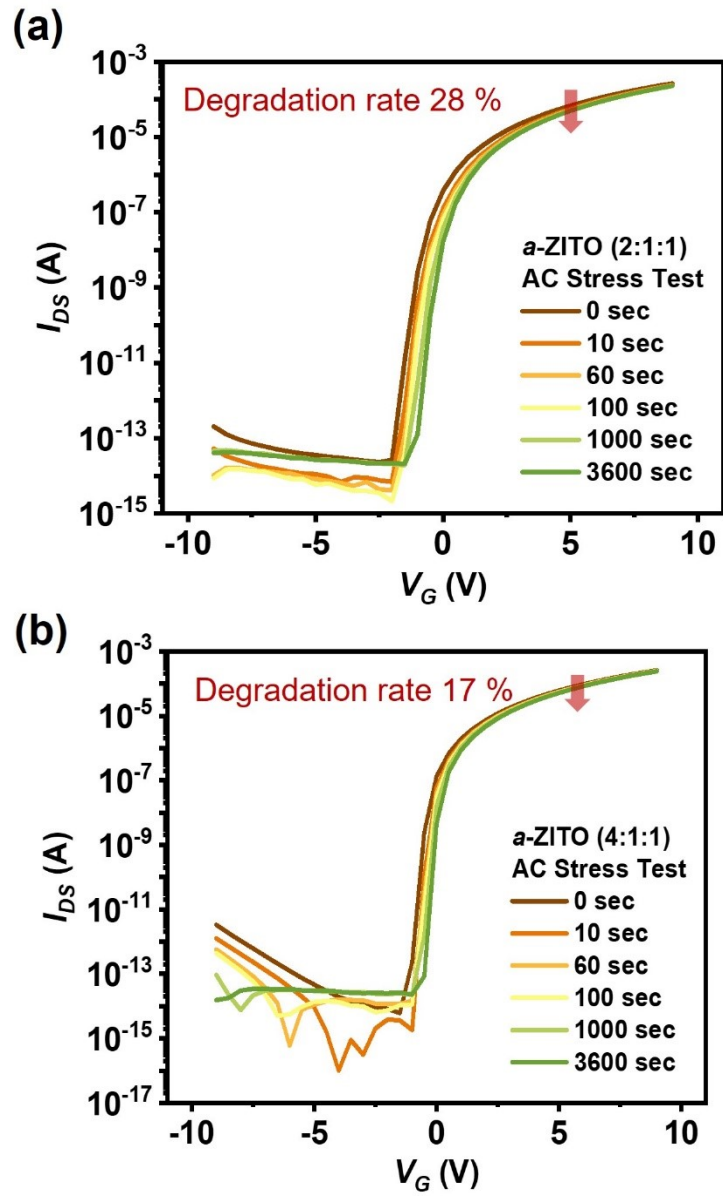

**Figure S3.** AC stress test results of *a*-ZITO TFTs with various Zn:In:Sn blending ratios of (a) 2:1:1, and (b) 4:1:1.



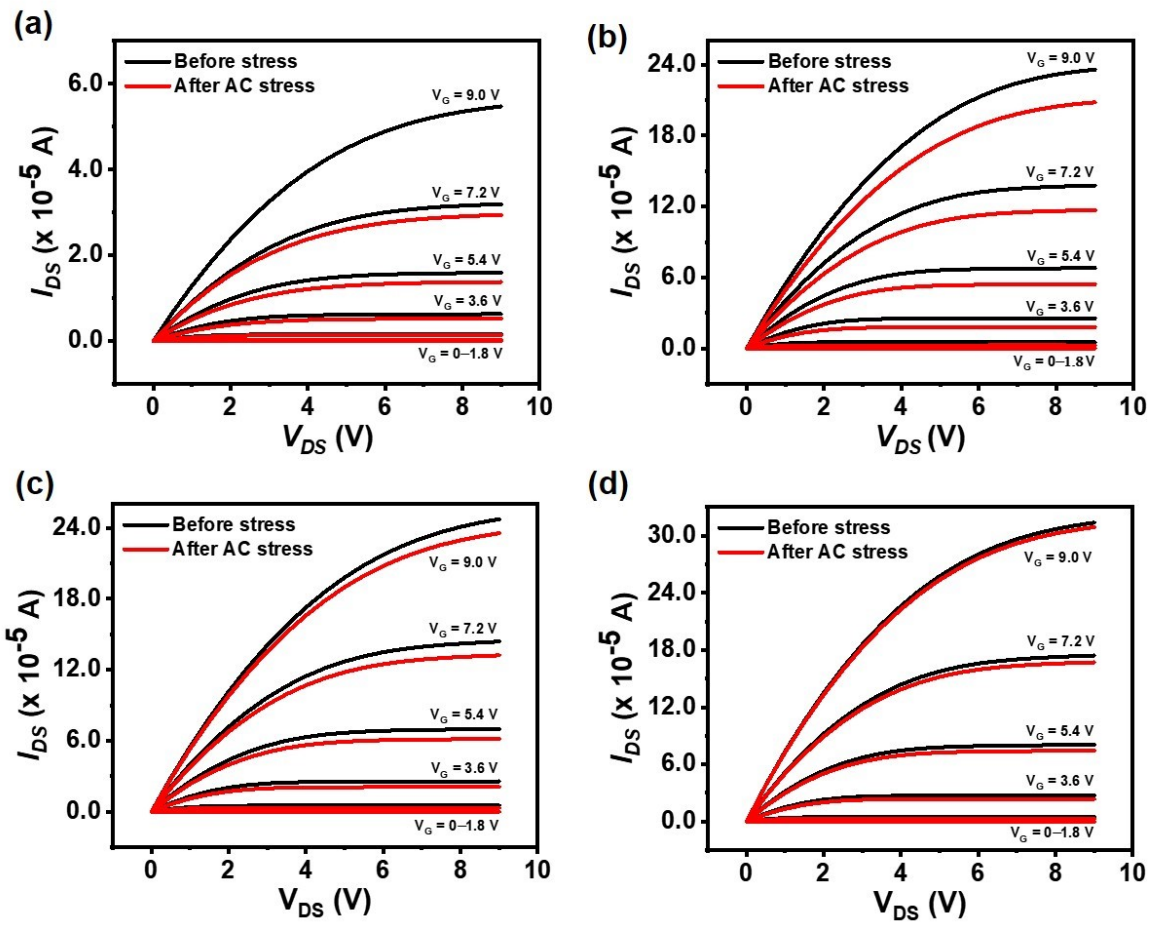

**Figure S4.** Output curves of (a) *a*-IGZO, (b) *a*-ZITO (2:1:1), (c) *a*-ZITO (4:1:1), and (d) *a*-ZITO (6:1:1) TFTs before and after AC stress of 3600 sec.

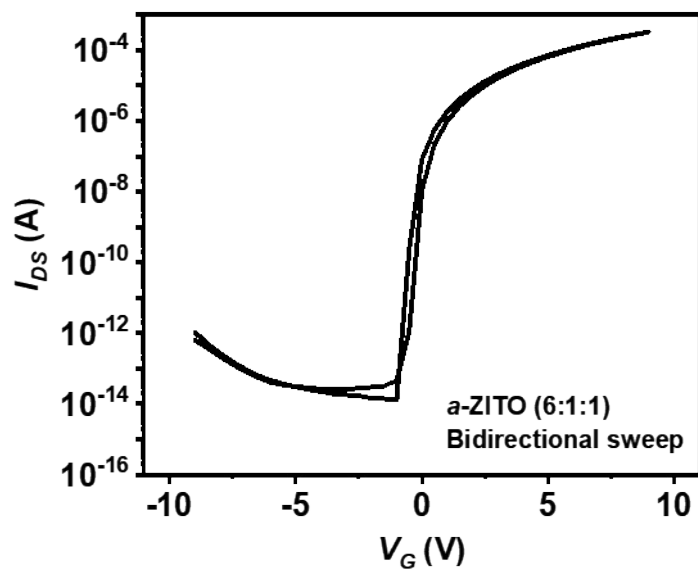

**Figure S5.** Bidirectional sweep of *a*-ZITO (6:1:1) TFT in dark measurement conditions.

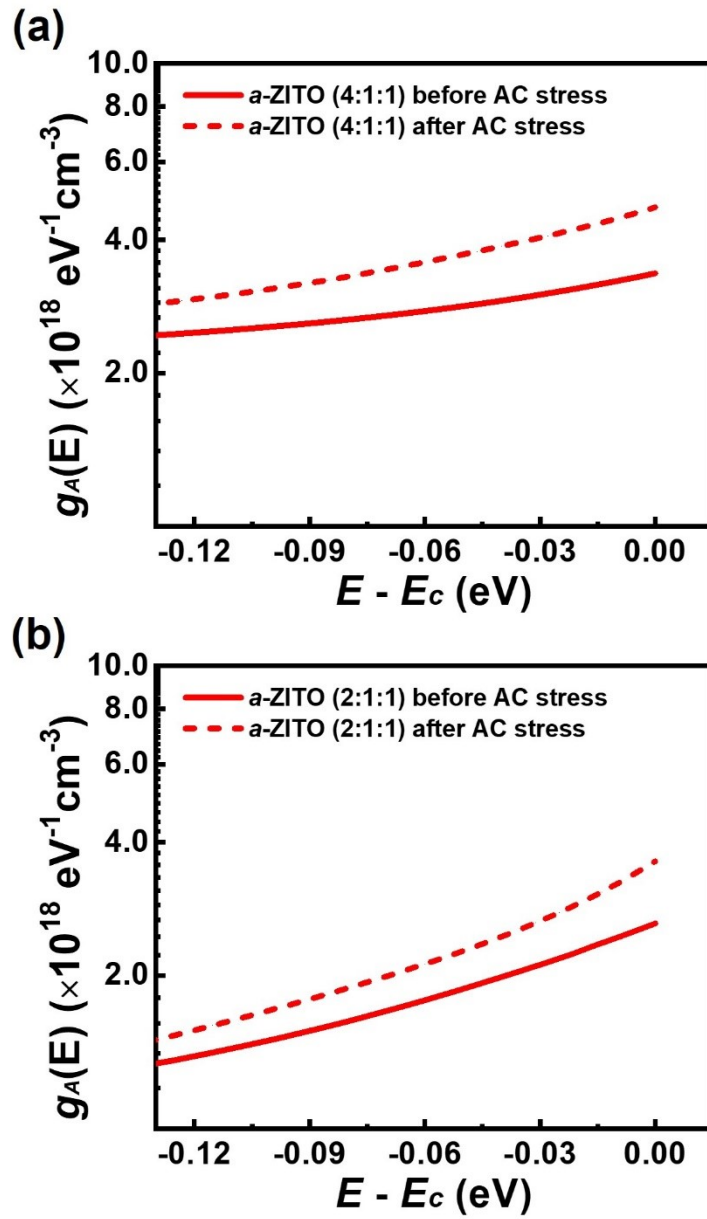

**Figure S6.** Subgap Density-of-states ( $g_A(E)$ ) extraction results below the conduction-band-minimum ( $E_C$ ) of the investigated (a) *a*-ZITO (4:1:1), and (b) *a*-ZITO (2:1:1) TFTs.

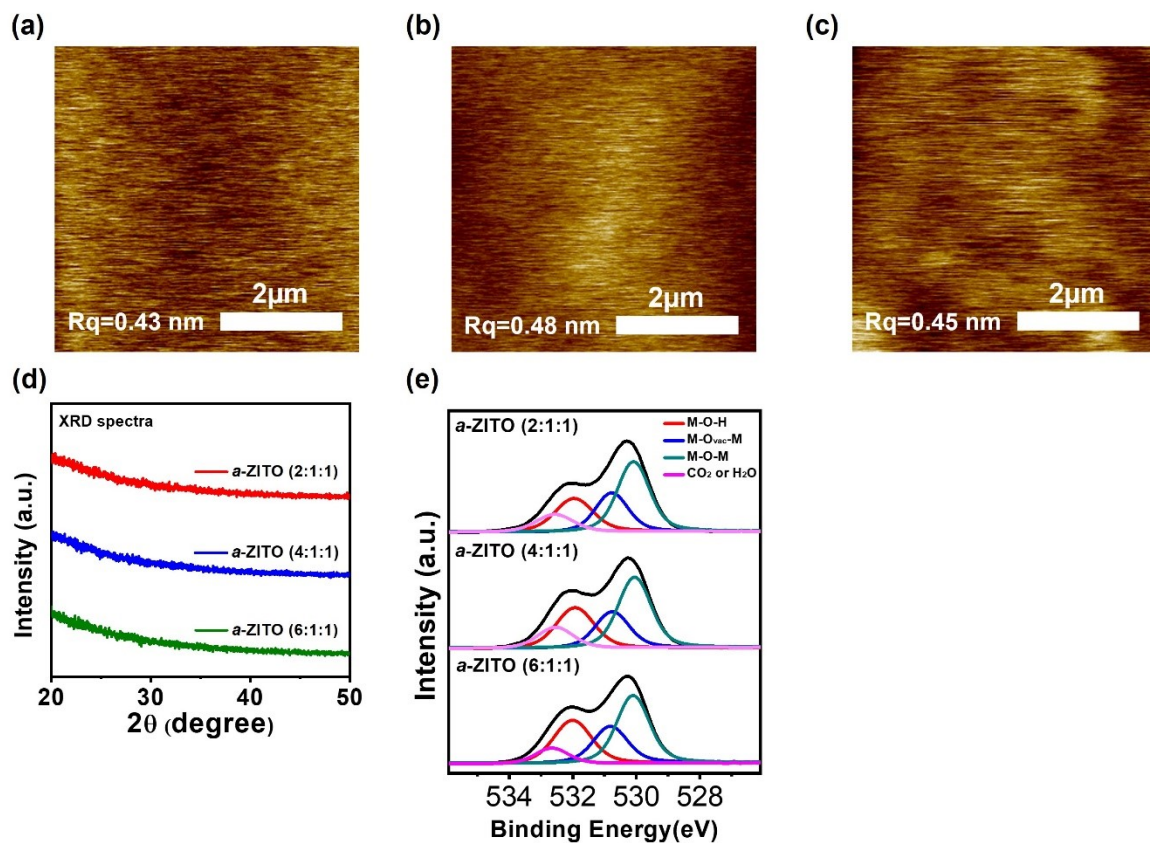

**Figure S7.** (a-c) Atomic force microscope (AFM) images of (a) *a*-ZITO (2:1:1), (b) *a*-ZITO (4:1:1), and (c) *a*-ZITO (6:1:1) films, (d) X-ray diffraction (XRD) spectra of *a*-ZITO films, and (e) X-ray photoelectron spectroscopy (XPS) analysis of *a*-ZITO films.

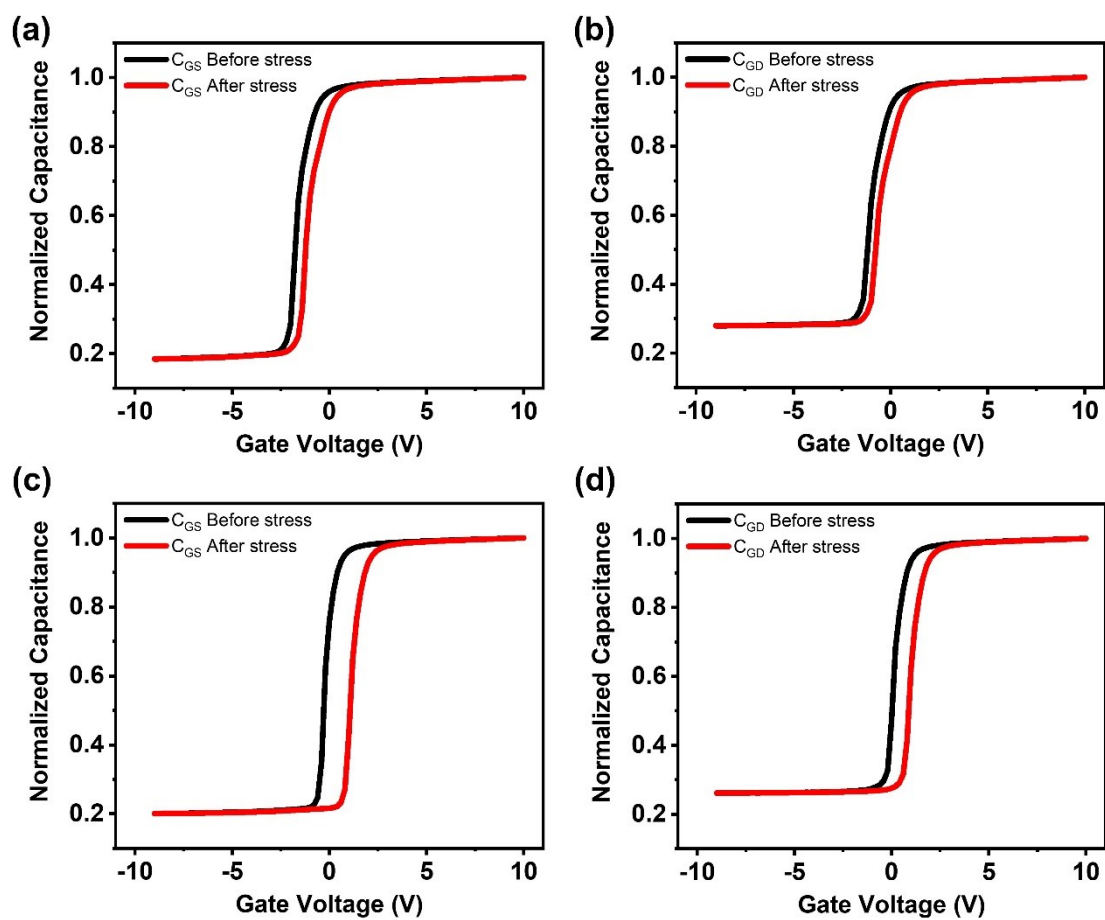

**Figure S8.** Capacitance-Voltage (C-V) measurement results of (a-b) *a*-ZITO (2:1:1), and (c-d) *a*-ZITO (4:1:1) TFTs: (a, c) gate-to-source ( $C_{GS}$ ), and (b, d) gate-to-drain ( $C_{GD}$ ) characteristics before and after AC drain stress of 3600 s.

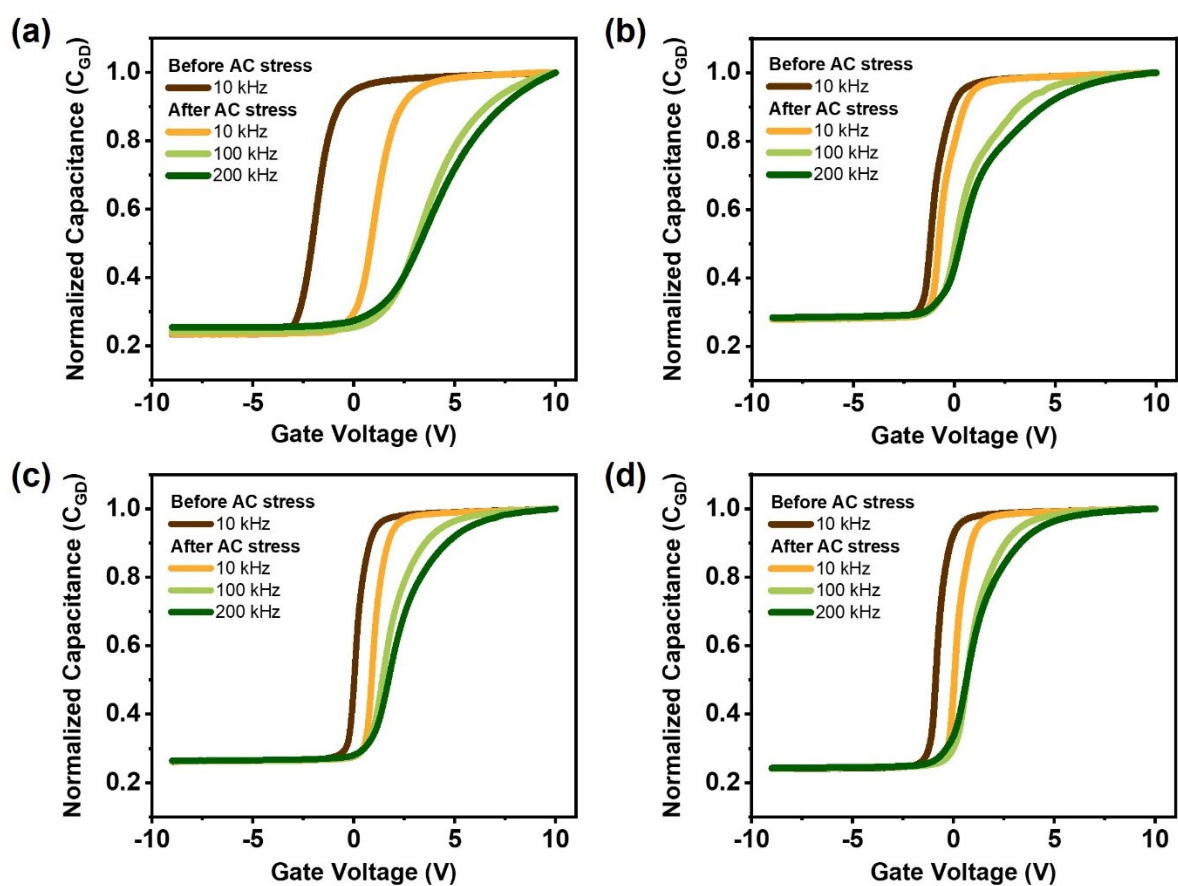

**Figure S9.** Gate-to-drain ( $C_{GD}$ ) capacitance-voltage (C-V) characteristics under various gate voltage frequencies for (a) *a*-IGZO, (b) *a*-ZITO (2:1:1), (c) *a*-ZITO (4:1:1), and (d) *a*-ZITO (6:1:1), TFTs before and after AC drain stress of 3600 s.

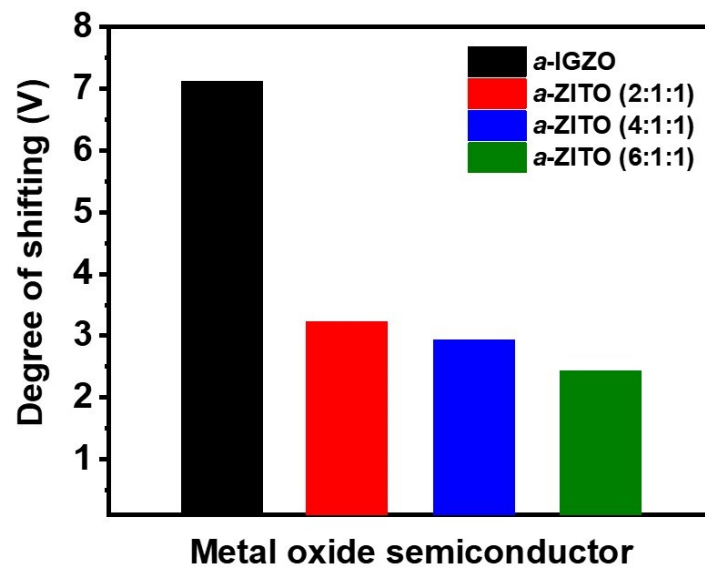

**Figure S10.** Comparison of the degree of shifting for  $C_{GD}$  of *a*-IGZO and *a*-ZITO TFTs.
